# Supplementary material for: β-caryophyllene sensitizes hepatocellular carcinoma cells to chemotherapeutics and inhibits cell malignancy through targeting MAPK signaling pathway
Source: Front Pharmacol. 2024 Dec 13;15:1492670. doi: 10.3389/fphar.2024.1492670 (PMC11671526; doi:10.3389/fphar.2024.1492670)
Supplement: Supplementary file 2 [file Table3.xlsx]

## Sheet: BCP vs control GO enrichment
Supplementary Table S3. DEGs based on GO enrichment analysis in BCP-treated HepG2 cells versus control cells
ONTOLOGY	ID	Description	GeneRatio	BgRatio	pvalue	p.adjust	qvalue	geneID	Count
BP	GO:0070371	ERK1 and ERK2 cascade	23/376	340/18903	3.65843e-07	0.00143959	0.0012843	IQGAP3/TPBG/GPNMB/ARRB1/PRKCZ/SULT1A4/GPER1/TEK/CCL2/CCL26/SPRY4/DDR2/TIMP3/ACKR3/TLR4/CCL5/F2RL1/BMP2/AGT/PTPRR/CSF1R/EPHA7/NECAB2	23
BP	GO:0043410	positive regulation of MAPK cascade	27/376	496/18903	2.5193e-06	0.00495672	0.00442203	IQGAP3/TPBG/GPNMB/ARRB1/PRKCZ/GPER1/TEK/CCL2/GSDME/CCL26/DDR2/ACKR3/TLR4/IL34/CCL5/F2RL1/BMP2/FZD4/BIRC7/TGFB3/ALOX12B/TGFA/CSF1R/ADRA2C/NECAB2/ADORA1/LRRK2	27
BP	GO:0070372	regulation of ERK1 and ERK2 cascade	20/376	315/18903	5.56146e-06	0.00729478	0.00650789	TPBG/GPNMB/ARRB1/PRKCZ/GPER1/TEK/CCL2/CCL26/SPRY4/DDR2/TIMP3/ACKR3/TLR4/CCL5/F2RL1/BMP2/PTPRR/CSF1R/EPHA7/NECAB2	20
BP	GO:0070997	neuron death	20/376	368/18903	5.235e-05	0.022792	0.0203334	DDIT3/GPNMB/SULT1A4/HSPA5/CCL2/NR4A3/NES/DDR2/RETREG1/TLR4/EFNB2/CCL5/TGFB3/EGLN3/EPHA7/ADORA1/THRB/ADORA2A/EN2/LRRK2	20
BP	GO:0032970	regulation of actin filament-based process	20/376	406/18903	0.000197763	0.0409578	0.0365396	RHOB/IQGAP3/TEK/RHOBTB1/CCL26/SEMA5A/RAPGEF3/MYLK3/F2RL1/SCIN/TGFB3/C15orf62/CSF1R/CARMIL2/FES/ADORA1/WASF3/ANK2/NPHS1/S1PR1	20
BP	GO:0052548	regulation of endopeptidase activity	19/376	428/18903	0.00100284	0.0747751	0.066709	C4B/TNFSF15/GPER1/LCK/SLPI/COL7A1/NR4A1/PI3/TIMP3/VSIR/BIRC7/EGLN3/AGT/CLEC7A/PAPLN/KHDC1/EPHA7/CPAMD8/ADORA2A	19
BP	GO:0007015	actin filament organization	19/376	454/18903	0.00197338	0.100293	0.0894743	RHOB/ARRB1/USH1C/SORBS2/RHOBTB1/CCL26/SEMA5A/RAPGEF3/F2RL1/SCIN/TGFB3/C15orf62/NEBL/CARMIL2/SORBS1/ARHGAP25/WASF3/NPHS1/S1PR1	19
BP	GO:0016055	Wnt signaling pathway	19/376	456/18903	0.00207313	0.100713	0.089849	LRRK1/DDIT3/NKD2/TPBG/RSPO3/PRICKLE2/SEMA5A/COL1A1/AXIN2/HIC1/BMP2/NOG/FZD4/NKD1/DAAM1/TCF7/CTNNBIP1/TRABD2B/LRRK2	19
BP	GO:0198738	cell-cell signaling by wnt	19/376	458/18903	0.0021771	0.103215	0.0920815	LRRK1/DDIT3/NKD2/TPBG/RSPO3/PRICKLE2/SEMA5A/COL1A1/AXIN2/HIC1/BMP2/NOG/FZD4/NKD1/DAAM1/TCF7/CTNNBIP1/TRABD2B/LRRK2	19
BP	GO:0033674	positive regulation of kinase activity	20/376	496/18903	0.00233944	0.105948	0.0945195	TNFSF15/PRKCZ/TCIM/TEK/DDR2/AXIN2/TLR4/IL34/CCL5/BMP2/FZD4/AGT/DOK7/CENPE/TGFA/CSF1R/ADRA2C/EPHA7/ADORA1/LRRK2	20
CC	GO:0044815	DNA packaging complex	13/399	178/19869	6.60295e-05	0.0150426	0.0141348	H3C14/H3C15/H2BC12/H1-2/H2BC5/H2AC6/H2BC21/NDC80/H2AC18/H2BC11/H4C8/H3C6/SMC1B	13
CC	GO:0000786	nucleosome	11/399	133/19869	7.87569e-05	0.0150426	0.0141348	H3C14/H3C15/H2BC12/H1-2/H2BC5/H2AC6/H2BC21/H2AC18/H2BC11/H4C8/H3C6	11
CC	GO:0016323	basolateral plasma membrane	14/399	229/19869	0.000232332	0.0295836	0.0277983	NKD2/RAB17/TEK/MAP7/DLG2/SLC9B2/ENPP1/ANK1/BEST1/TGFA/SLC4A11/ADORA1/ANK2/HPGD	14
CC	GO:0032993	protein-DNA complex	13/399	225/19869	0.000656805	0.0465556	0.0437461	H3C14/H3C15/DDIT3/H2BC12/H1-2/H2BC5/H2AC6/H2BC21/H2AC18/H2BC11/H4C8/NFE2/H3C6	13
CC	GO:0009925	basal plasma membrane	14/399	254/19869	0.000657982	0.0465556	0.0437461	NKD2/RAB17/TEK/MAP7/DLG2/SLC9B2/ENPP1/ANK1/BEST1/TGFA/SLC4A11/ADORA1/ANK2/HPGD	14
CC	GO:0045178	basal part of cell	14/399	272/19869	0.00127262	0.0607674	0.0571002	NKD2/RAB17/TEK/MAP7/DLG2/SLC9B2/ENPP1/ANK1/BEST1/TGFA/SLC4A11/ADORA1/ANK2/HPGD	14
CC	GO:0098791	Golgi apparatus subcompartment	15/399	387/19869	0.012017	0.208658	0.196066	MMP24/CHST2/HID1/GPER1/BACE2/CLTCL1/ATP11C/ATP9A/XYLT1/B4GALNT4/PCSK1/RAB43/CHST6/LRRK2/FUT3	15
CC	GO:0005769	early endosome	14/399	414/19869	0.0410103	0.460763	0.432957	RHOB/RAB17/GPNMB/GPER1/ATP11C/DNER/ATP9A/ACKR3/TLR4/F2RL1/PLEKHF1/PTP4A3/MVB12B/ANK2	14
CC	GO:0005925	focal adhesion	14/399	422/19869	0.046775	0.46396	0.435962	RHOB/CSRP2/TEK/HSPA5/SORBS2/SPRY4/DDR2/EFNB2/NEXN/SNTB1/SORBS1/FES/TLN2/NPHS1	14
CC	GO:0030055	cell-substrate junction	14/399	432/19869	0.0547495	0.466327	0.438185	RHOB/CSRP2/TEK/HSPA5/SORBS2/SPRY4/DDR2/EFNB2/NEXN/SNTB1/SORBS1/FES/TLN2/NPHS1	14
MF	GO:0030527	structural constituent of chromatin	11/387	99/18432	7.31508e-06	0.00466702	0.00428895	H3C14/H3C15/H2BC12/H1-2/H2BC5/H2AC6/H2BC21/H2AC18/H2BC11/H4C8/H3C6	11
MF	GO:0005506	iron ion binding	13/387	153/18432	2.12679e-05	0.00678447	0.00623486	P4HA3/CYP3A7/CYP11A1/CYP3A5/CYP26B1/CYP1A1/EGLN3/ALOX12B/ALOXE3/HBA1/CYP24A1/AOX1/CYP39A1	13
MF	GO:0046906	tetrapyrrole binding	11/387	149/18432	0.000314904	0.0401817	0.0369266	PTGS1/CYP3A7/CYP11A1/CYP3A5/PXDN/CYP26B1/TCN1/CYP1A1/HBA1/CYP24A1/CYP39A1	11
MF	GO:0046982	protein heterodimerization activity	17/387	341/18432	0.000932365	0.0700061	0.0643349	H3C14/H3C15/DDIT3/H2BC12/H2BC5/NR4A1/H2AC6/DGKD/H2BC21/TLR4/H2AC18/FZD4/H2BC11/H4C8/ADRA2C/ADORA1/H3C6	17
MF	GO:0016705	oxidoreductase activity, acting on paired donors, with incorporation or reduction of molecular oxygen	11/387	179/18432	0.00144845	0.0769548	0.0707207	P4HA3/PTGS1/CYP3A7/CYP11A1/CYP3A5/CYP26B1/CYP1A1/EGLN3/CYP24A1/AKR1C1/CYP39A1	11
MF	GO:0042578	phosphoric ester hydrolase activity	17/387	365/18432	0.00193329	0.088103	0.0809658	ALPL/LRRK1/ALPI/LCK/PDE7B/CCL5/PLD1/ENPP1/CDC25C/PTPRR/PLCD4/PLCH1/PTP4A3/DUSP18/FICD/SMPDL3A/LRRK2	17
MF	GO:0003779	actin binding	18/387	439/18432	0.0055496	0.189118	0.173797	MAP1A/TAGLN/MYH15/IQGAP3/USH1C/ABLIM2/S100A4/NEXN/SCIN/SNTB1/DAAM1/MYH14/NEBL/SORBS1/TLN2/MYPN/WASF3/LRRK2	18
MF	GO:0001664	G protein-coupled receptor binding	13/387	289/18432	0.00835433	0.213203	0.195931	ARRB1/CCL2/GNAZ/RSPO3/CCL26/NES/CCL5/AGT/ADRA2C/NECAB2/ADORA1/ADORA2A/S1PR1	13
MF	GO:0030246	carbohydrate binding	11/387	275/18432	0.0313204	0.32372	0.297495	C4B/P4HA3/KLRG1/HK1/GALNT13/FBXO2/GALNTL6/EGLN3/ENPP1/CLEC7A/CRYBG1	11
MF	GO:0048018	receptor ligand activity	16/387	491/18432	0.0558215	0.41632	0.382594	TNFSF15/GPNMB/CCL2/CCL26/SEMA5A/IL34/CCL5/BMP2/TGFB3/AGT/TGFA/FGF11/EPHA7/PGF/ARTN/FGF12	16
